# Supplementary material for: Identifying Reasons for Statin Nonuse in Patients With Diabetes Using Deep Learning of Electronic Health Records
Source: PubMed Central journal article supplement — J Am Heart Assoc. 2023 Mar 28;12(7):e028120. doi: 10.1161/JAHA.122.028120 (PMC10122887; doi:10.1161/jaha.122.028120), 2023-03-28
Supplement: JAH3-12-e028120-s001.pdf [file JAH3-12-e028120-s001.pdf]

## **SUPPLEMENTAL MATERIAL**

**Table S1. RxNorm codes for statin medications**

| <b>Medication name</b> | <b>RxCUI codes</b> |
|------------------------|--------------------|
| Lovastatin             | 6472               |
| Pitavastatin           | 861634             |
| Fluvastatin            | 41127              |
| Rosuvastatin           | 301542             |
| Pravastatin            | 42463              |
| Atorvastatin           | 83367              |
| Simvastatin            | 36567              |

**Abbreviations: CUI, concept unique identifier**

**Table S2. Statin term dictionary**

|              |
|--------------|
| Statin       |
| Atorvastatin |
| Fluvastatin  |
| Lovastatin   |
| Pitavastatin |
| Pravastatin  |
| Rosuvastatin |
| Simvastatin  |
| Altocor      |
| Altoprev     |
| Crestor      |
| Juvisync     |
| Lescol       |
| Lipitor      |
| Livalo       |
| Mevacor      |
| Pravachol    |
| Zocor        |

**Table S3. Predictors of statin prescriptions in structured EHR data**

| Variables                                             |                               | Unadjusted          |        | Adjusted*           |        |
|-------------------------------------------------------|-------------------------------|---------------------|--------|---------------------|--------|
|                                                       |                               | OR (95% CI)         | p      | OR (95% CI)         | p      |
| <b>Diabetes Type</b><br>(Ref:Type II - N=31027)       | Type I (N = 2434)             | 0.334 (0.305-0.366) | <0.001 | 0.714 (0.640-0.797) | <0.001 |
| <b>Age Group</b><br>(Ref:40-75 - N = 25292)           | >75 (N = 4344)                | 1.463 (1.368-1.564) | <0.001 | 1.106 (1.017-1.204) | 0.019  |
|                                                       | 20-39 (N = 3825)              | 0.177 (0.162-0.193) | <0.001 | 0.257 (0.234-0.283) | <0.001 |
| <b>Sex</b><br>(Ref:Male - N = 16921)                  | Female (N = 16540)            | 0.814 (0.780-0.850) | <0.001 | 0.778 (0.740-0.817) | <0.001 |
| <b>Race</b><br>(Ref:Non-Hispanic White - N = 12127)   | Non-Hispanic Asian (N = 8067) | 1.081 (1.021-1.144) | 0.008  | 1.316 (1.237-1.400) | <0.001 |
|                                                       | Hispanic (N = 5027)           | 0.718 (0.672-0.766) | <0.001 | 0.927 (0.858-1.002) | 0.057  |
|                                                       | Other (N = 4026)              | 0.837 (0.779-0.898) | <0.001 | 1.074 (0.992-1.162) | 0.077  |
|                                                       | Non-Hispanic Black (N = 2751) | 0.853 (0.785-0.927) | <0.001 | 0.802 (0.732-0.879) | <0.001 |
| <b>Provider Location</b><br>(Ref: UHA - N = 22461)    | SHC (N = 10084)               | 0.764 (0.728-0.800) | <0.001 | 0.783 (0.740-0.830) | <0.001 |
|                                                       | Valleycare (N = 137)          | 0.976 (0.697-1.368) | 0.931  | 0.772 (0.537-1.110) | 0.163  |
| <b>Insurance status</b><br>(Ref: Private - N = 12345) | Medicare (N = 10561)          | 1.960 (1.859-2.066) | <0.001 | 1.291 (1.209-1.377) | <0.001 |
|                                                       | Medicaid (N = 1683)           | 1.103 (0.997-1.222) | 0.061  | 1.087 (0.966-1.224) | 0.166  |

\*Adjusted for all characteristics in Table 1 of the primary manuscript.

**Table S4. Predictors of high-intensity statin prescriptions in structured EHR data**

| Variables                                            |                               | Unadjusted          |        | Adjusted*           |        |
|------------------------------------------------------|-------------------------------|---------------------|--------|---------------------|--------|
|                                                      |                               | OR (95% CI)         | p      | OR (95% CI)         | p      |
| <b>Diabetes Type</b><br>(ref:Type II - N=16617)      | Type I (N = 674)              | 0.986 (0.816-1.192) | 0.923  | 0.858 (0.703-1.047) | 0.131  |
| <b>Age Group</b><br>(ref:40-75 - N = 13836)          | >75 (N = 2774)                | 0.689 (0.618-0.768) | <0.001 | 0.679 (0.599-0.769) | <0.001 |
|                                                      | 20-39 (N = 681)               | 0.860 (0.709-1.043) | 0.13   | 0.842 (0.688-1.031) | 0.096  |
| <b>Sex</b><br>(Ref:Male - N = 9171)                  | Female (N = 8117)             | 0.785 (0.730-0.846) | <0.001 | 0.790 (0.731-0.855) | <0.001 |
| <b>Race</b><br>(Ref:N on-Hispanic White - N = 6479)  | Non-Hispanic Asian (N = 4462) | 0.820 (0.745-0.904) | <0.001 | 0.628 (0.570-0.693) | <0.001 |
|                                                      | Hispanic (N = 2278)           | 1.191 (1.064-1.333) | 0.003  | 1.015 (0.900-1.146) | 0.805  |
|                                                      | Other (N = 1974)              | 0.994 (0.878-1.124) | 0.95   | 0.805 (0.711-0.911) | <0.001 |
|                                                      | Non-Hispanic Black (N = 1374) | 1.310 (1.145-1.499) | <0.001 | 1.150 (1.002-1.320) | 0.047  |
| <b>Provider Location</b><br>(Ref: UHA - N = 12267)   | SHC (N = 4478)                | 1.265 (1.168-1.370) | <0.001 | 1.244 (1.139-1.359) | <0.001 |
|                                                      | Valleycare (N = 74)           | 0.775 (0.417-1.441) | 0.469  | 0.761 (0.406-1.426) | 0.395  |
| <b>Insurance status</b><br>(Ref: Private - N = 5569) | Medicare (N = 6481)           | 0.982 (0.900-1.073) | 0.703  | 0.966 (0.876-1.065) | 0.488  |
|                                                      | Medicaid (N = 792)            | 1.387 (1.171-1.643) | <0.001 | 1.182 (0.986-1.417) | 0.071  |

\*Adjusted for all characteristics in Table 1 of the primary manuscript.
